# Supplementary material for: Fitting a square beam in a square camera: Novel condenser apertures for low-dose transmission electron microscopy
Source: Research Square preprint supplement (doi:10.21203/rs.3.rs-3316272/v1), 2023-09-15
Supplement: Supplementary file 13 [file Supplementary.pdf › Supplementary/Supplementary.pdf]

# Supplementary material

Hamish G. Brown, Dan Smith, Benjamin C. Wardle and Eric Hanssen

September 1, 2023

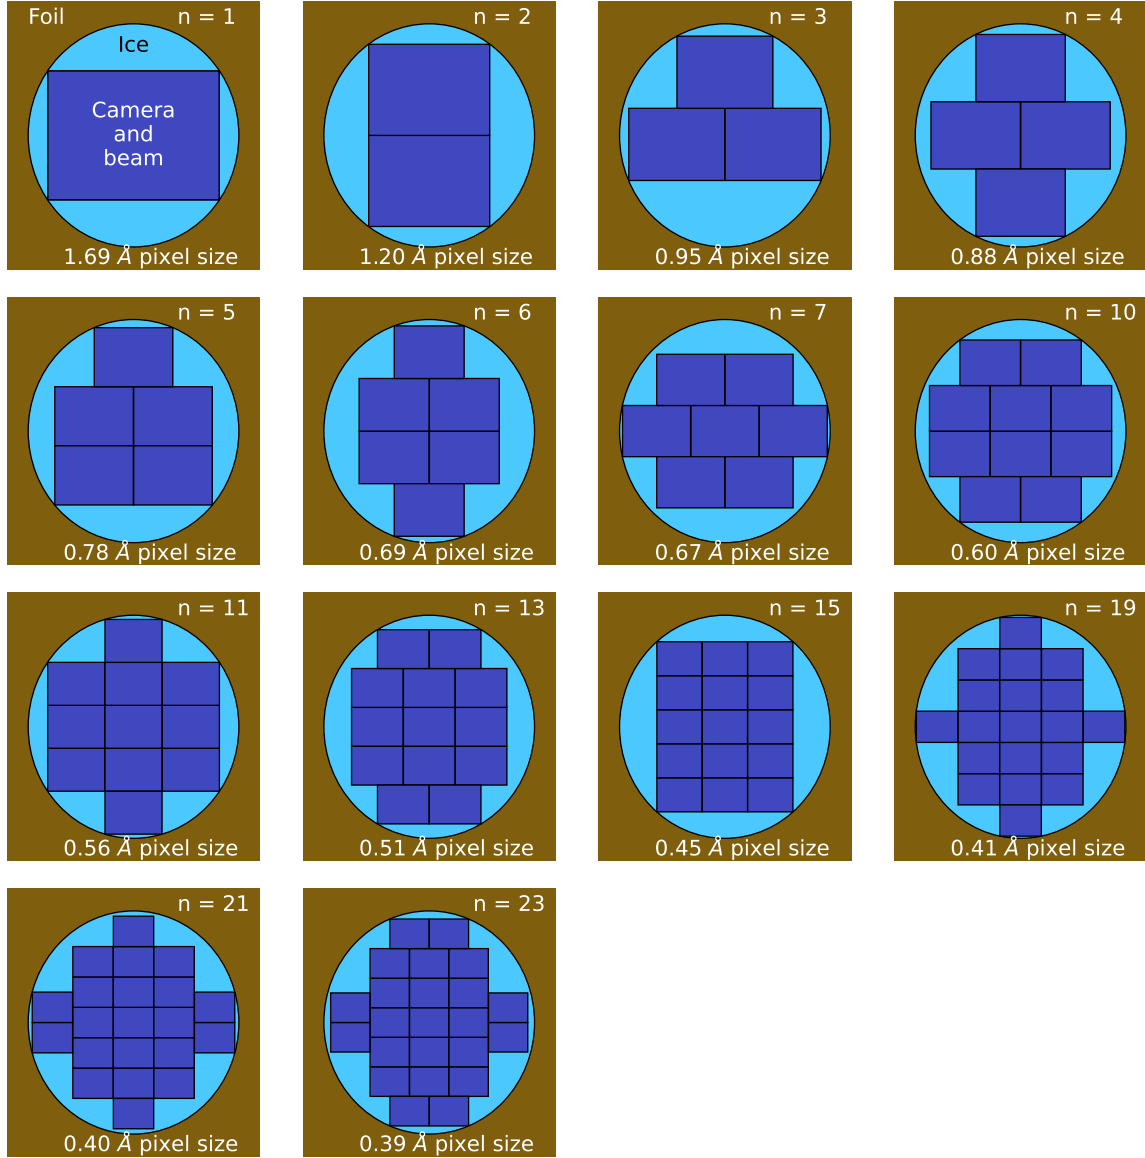

Figure S1: Multishot configurations for a rectangular K3 camera and matching beam ( $5760 \times 4092$  pixel) camera inside a  $1.2 \mu\text{m}$  diameter foil hole used to generate the efficiency measurements presented in Fig. 2 of the main text.

| Magnification | Pixel<br>(Å) | Sensor<br>(nm) | Beam<br>(nm) | Aperture<br>( $\mu\text{m}$ ) |
|---------------|--------------|----------------|--------------|-------------------------------|
| 79,000        | 1.71         | 656            | 956          | 29.5                          |
| 100,000       | 1.33         | 510            | 820          | 24.5                          |
| 130,000       | 1.03         | 395            | 695          | 20.5                          |
| 165,000       | 0.788        | 302            | 602          | 17.5                          |

Table 1: Different acquisition magnifications commonly used in our Talos Arctica microscope with the calibrated pixel size, size of the acquisition region on a  $4096 \times 4096$  pixel K2 camera, the required size of the beam, factoring in the 75 nm Fresnel fringes and the final size of the aperture which factored in another 75 nm to account for beam drift during an acquisition.

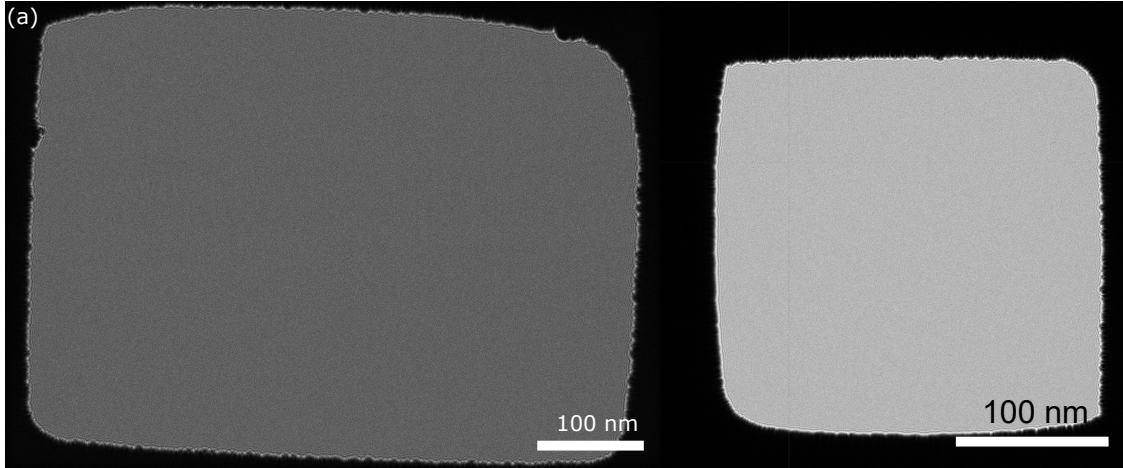

Figure S2: (a) Image of the beam with a rectangular aperture recorded on the K3 camera and (b) the beam formed by a square aperture with the Falcon IV camera. alignment is to within  $10^\circ$  with the camera and fringes at the edge measure less than 1 nm with the fringe-free illumination system. Imperfect etching seen in Fig. 1(d) is visible in the beam resulting in rounded edges.
