# Supplementary figures and images for: Fitting a square beam in a square camera: Novel condenser apertures for low-dose transmission electron microscopy
Source: Research Square preprint supplement (doi:10.21203/rs.3.rs-3316272/v1), 2023-09-15

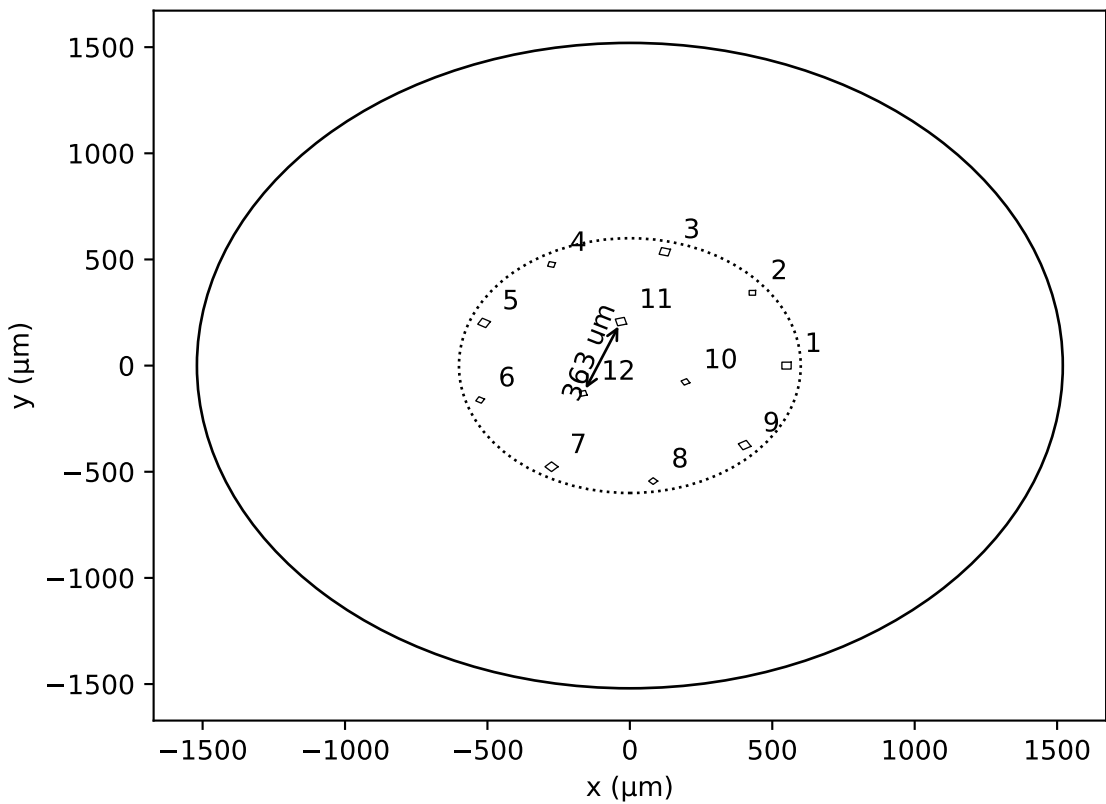

Supplement: Supplementary file 2 [file Arctica_0.pdf › Apertures/Arctica_0.pdf]

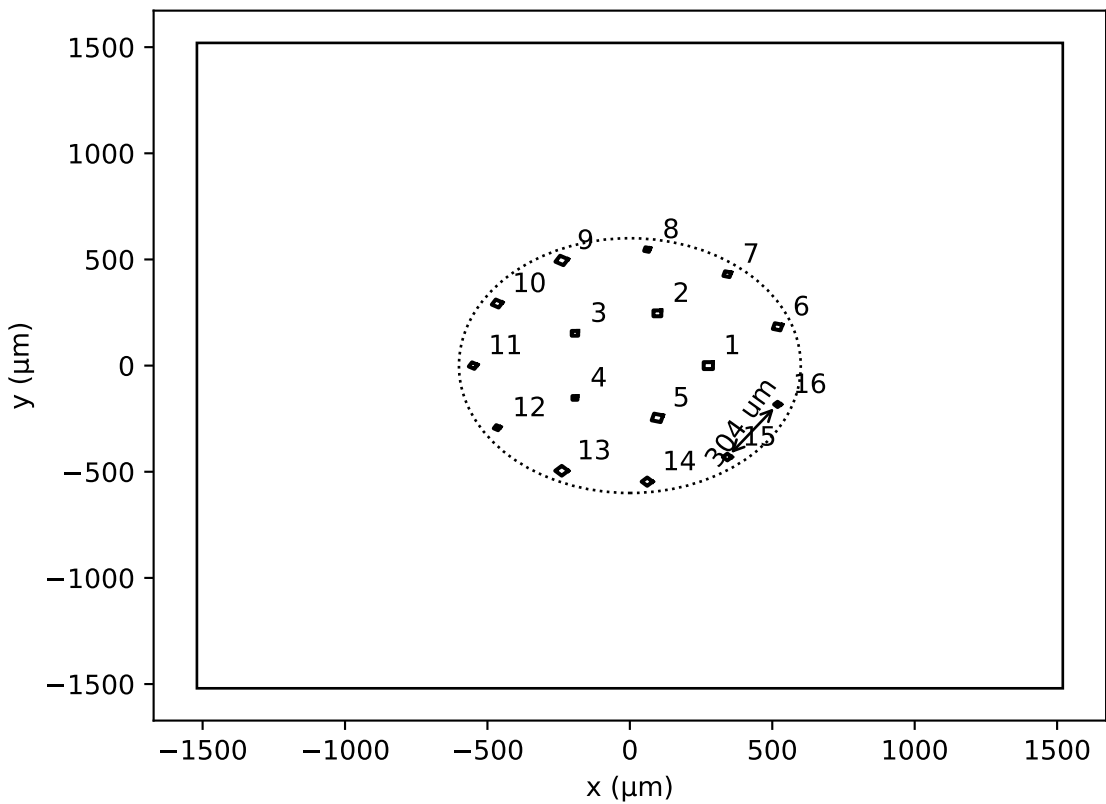

Supplement: Supplementary file 3 [file Arctica_0.pdf › Apertures/Arctica_0.pdf]

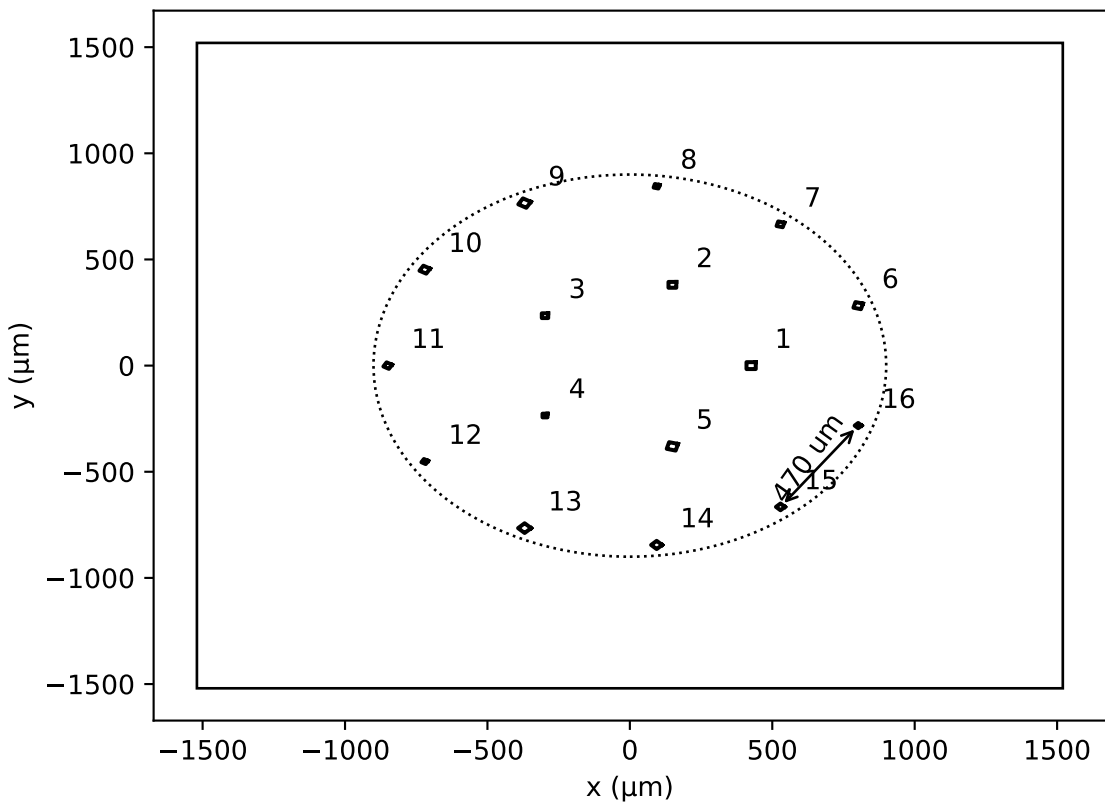

Supplement: Supplementary file 4 [file Arctica_2.pdf › Apertures/Arctica_2.pdf]

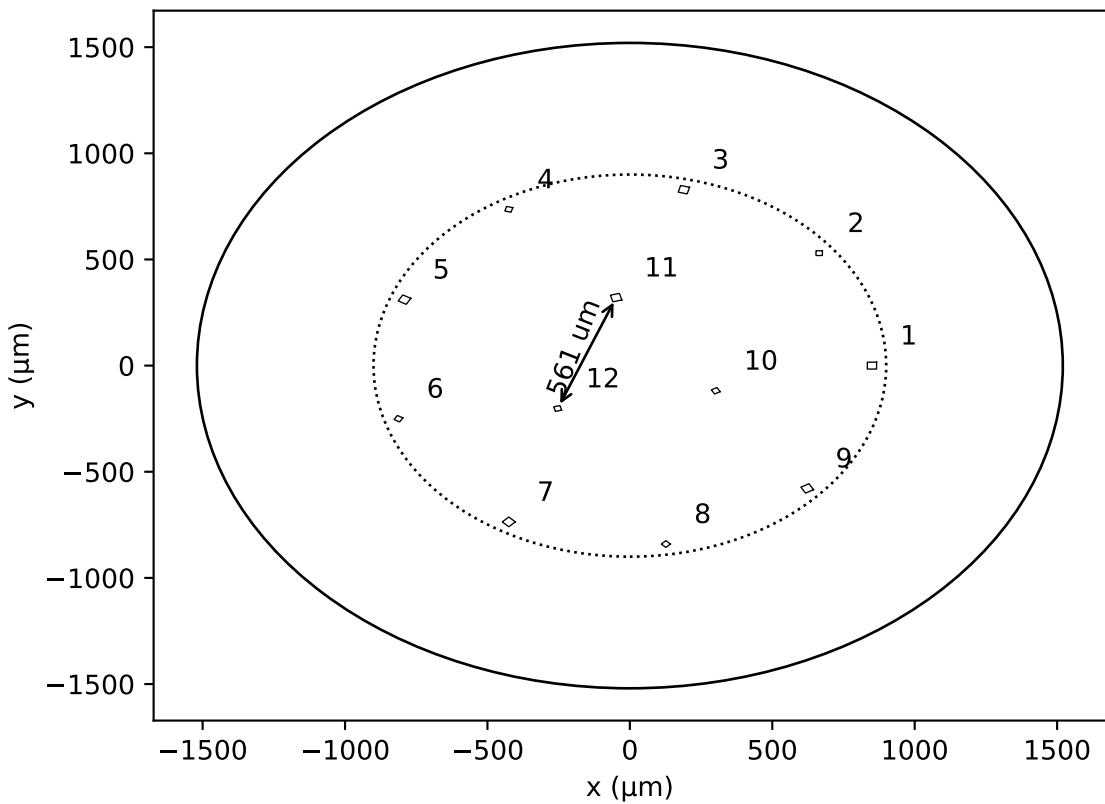

Supplement: Supplementary file 5 [file Arctica_2.pdf › Apertures/Arctica_2.pdf]

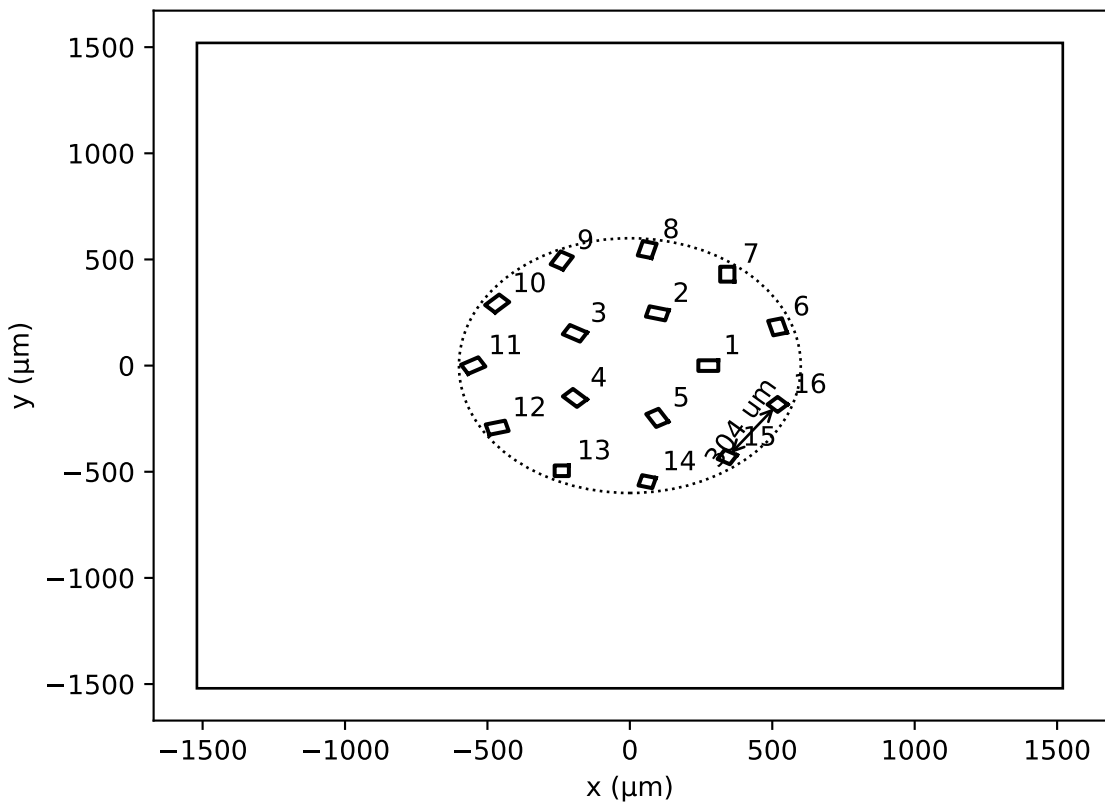

Supplement: Supplementary file 6 [file Krios_0.pdf › Apertures/Krios_0.pdf]

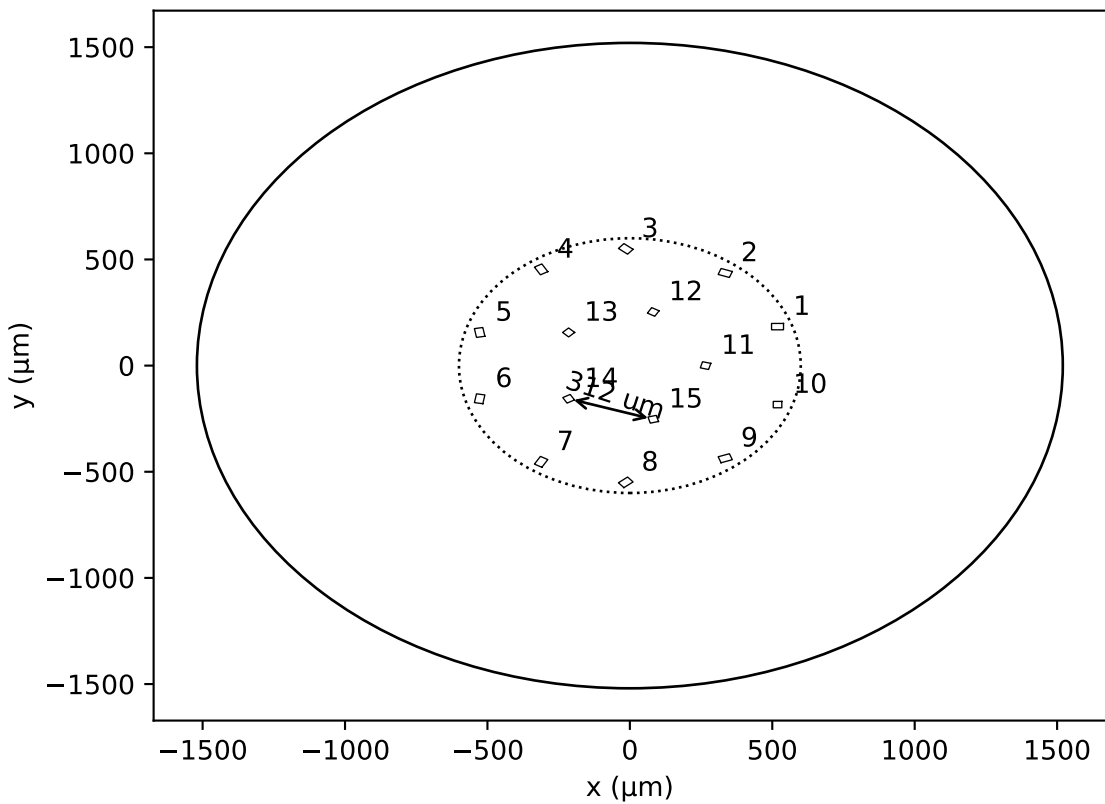

Supplement: Supplementary file 7 [file Krios_0.pdf › Apertures/Krios_0.pdf]

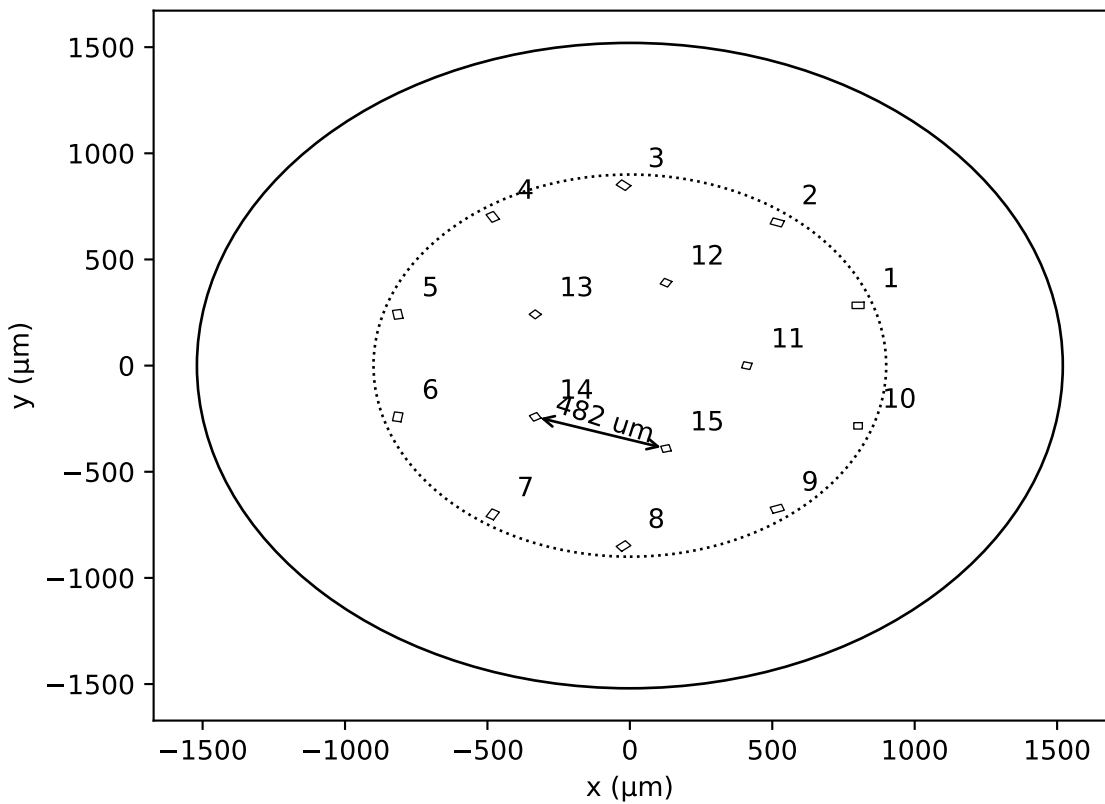

Supplement: Supplementary file 8 [file Krios_1.pdf › Apertures/Krios_1.pdf]

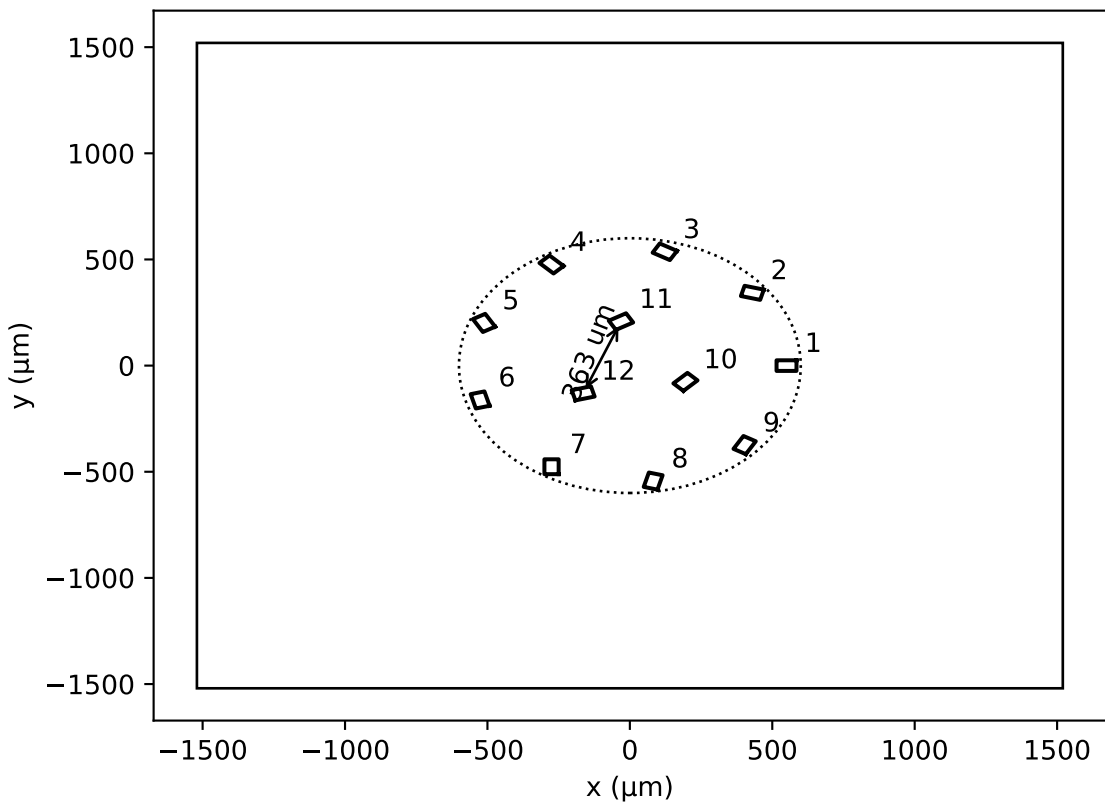

Supplement: Supplementary file 9 [file Krios_1.pdf › Apertures/Krios_1.pdf]

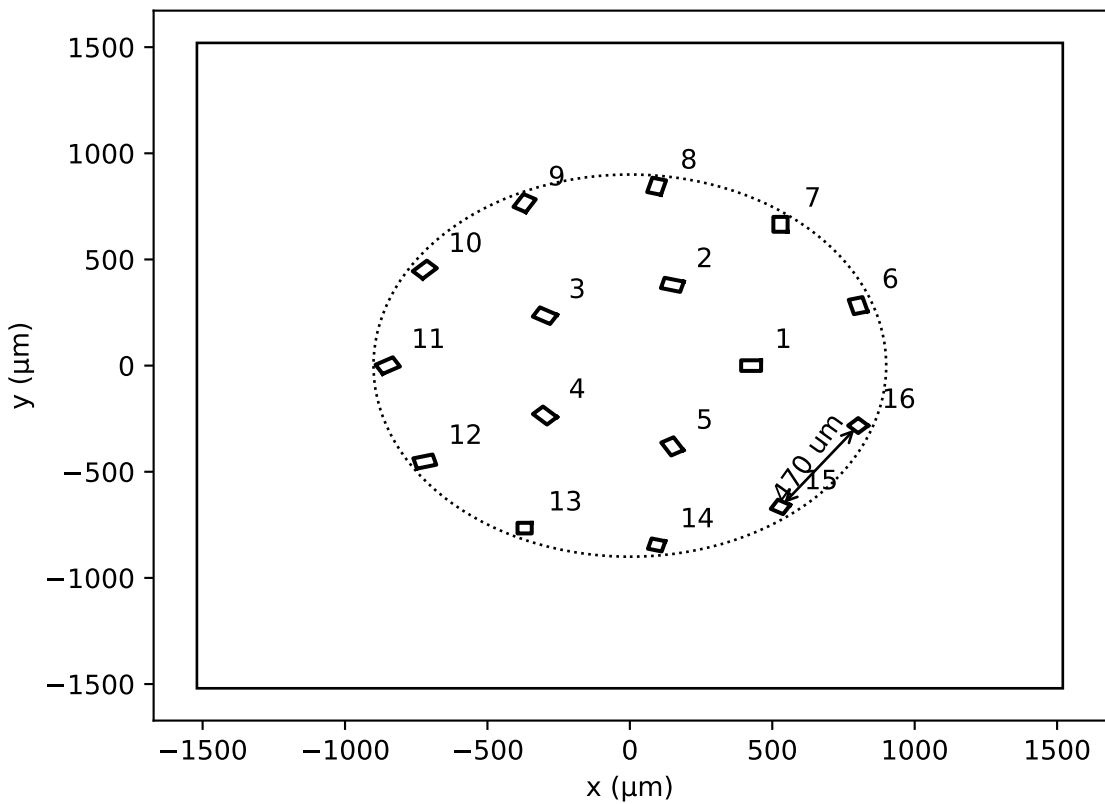

Supplement: Supplementary file 10 [file Krios_2.pdf › Apertures/Krios_2.pdf]

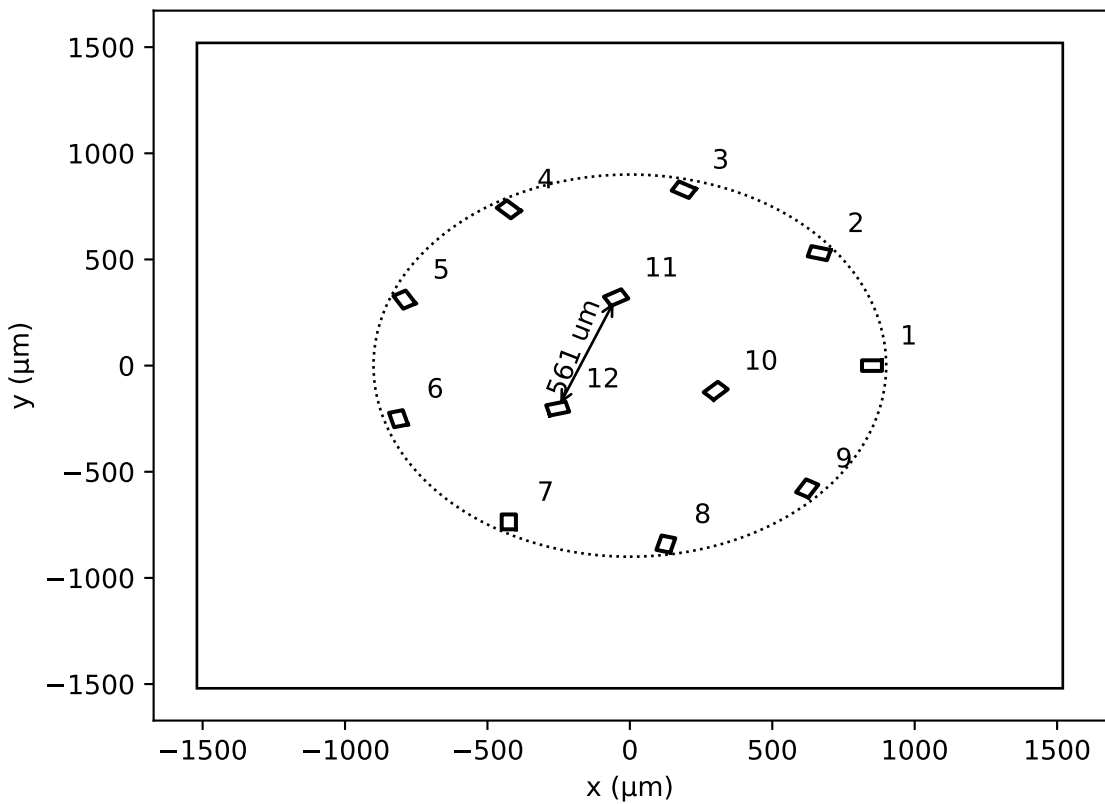

Supplement: Supplementary file 11 [file Krios_3.pdf › Apertures/Krios_3.pdf]

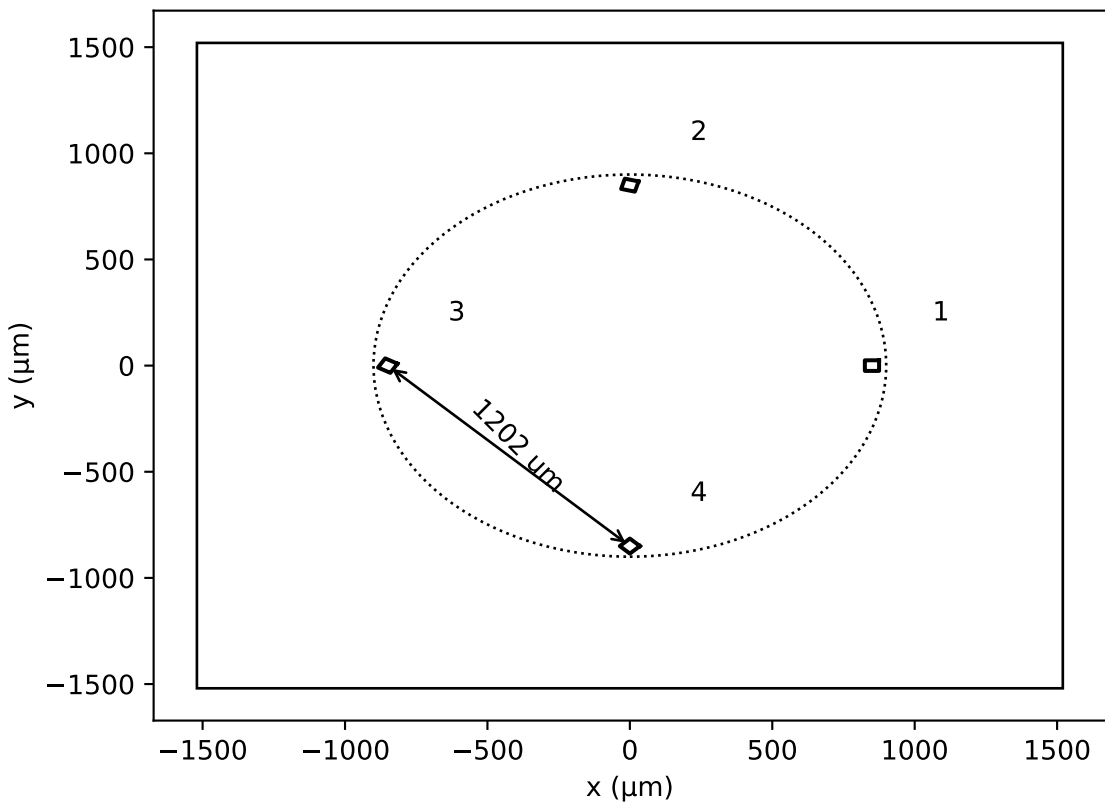

Supplement: Supplementary file 12 [file Krios_4.pdf › Apertures/Krios_4.pdf]
